# Supplementary material for: Sensing of hydrogen peroxide and glucose in human serum via quenching fluorescence of biomolecule-stabilized Au nanoclusters assisted by the Fenton reaction
Source: Royal Society of Chemistry journal article supplement (doi:10.1039/c7ra01498h), 2017-01-01
Supplement: c7ra01498h1.pdf [file c7ra01498h1.pdf]

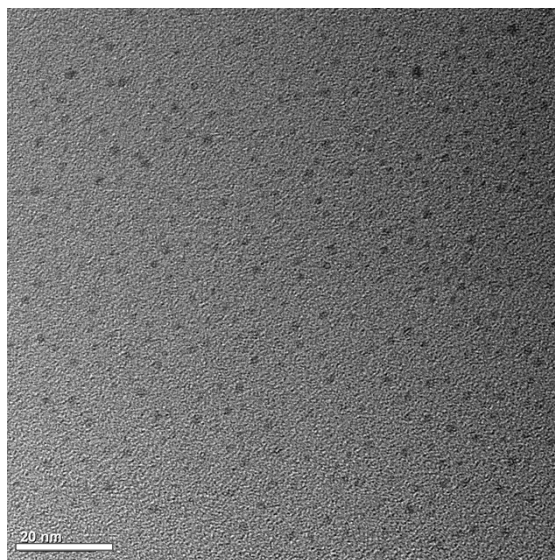

**Fig. S1.** Typical TEM image of the as-prepared Au NCs

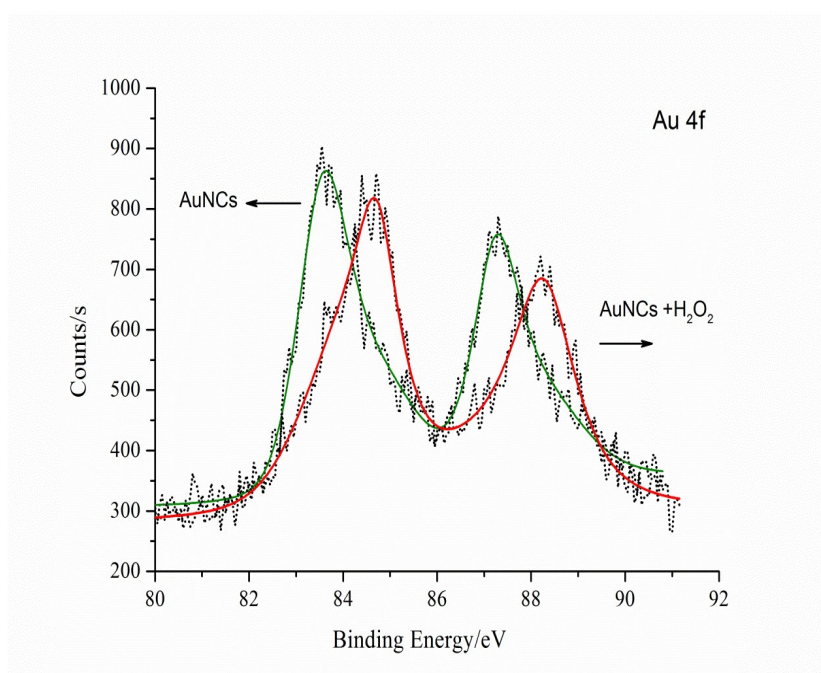

**Fig. S2.** XPS spectra of Au 4f core-level for the Au NCs in the absence of H<sub>2</sub>O<sub>2</sub> (green line) and in the presence (red line) of 0.1 mM H<sub>2</sub>O<sub>2</sub>.

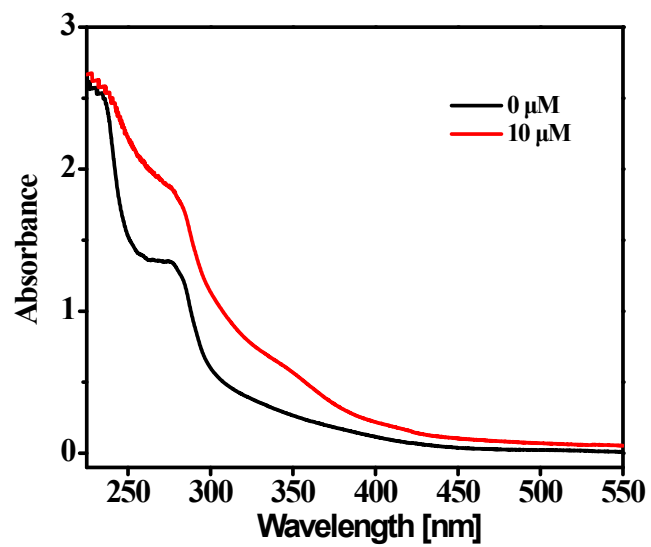

**Fig. S3.** Absorbance spectra of Au NCs in the absence and presence of 10 μM H<sub>2</sub>O<sub>2</sub>

**Table S1**

Comparison of the present method with other optical method.

| Method                 | System              | Detection limit for H <sub>2</sub> O <sub>2</sub> (M) | Detection limit for glucose (M) | Reaction Time (for H <sub>2</sub> O <sub>2</sub> ) | Reference |
|------------------------|---------------------|-------------------------------------------------------|---------------------------------|----------------------------------------------------|-----------|
| Optical (Colorimetry)  | Au nanorod          | 0.1                                                   | 1                               | 3h                                                 | 1         |
| Optical (Colorimetry)  | Au NPs -Cys-I-      | $2 \times 10^{-6}$                                    | $1 \times 10^{-6}$              | 30 min                                             | 2         |
| Optical (Colorimetry)  | N-GQDs-TMB          | $5.3 \times 10^{-6}$                                  | $1.6 \times 10^{-5}$            | 30 min                                             | 3         |
| Optical (Colorimetry)  | Cu NCs-TMB          | $1 \times 10^{-5}$                                    | $1 \times 10^{-4}$              | 15 min                                             | 4         |
| Optical (Fluorescence) | PVP-AuNPs/BSA-AuNCs | $8 \times 10^{-7}$ □□                                 | not given                       | 1h                                                 | 5         |
| Optical (Fluorescence) | PEI-Cu NCs          | $4 \times 10^{-7}$ □□                                 | $8 \times 10^{-6}$              | 45 min                                             | 6         |
| Optical (Fluorescence) | CdSe/ZnS QDs        | 0.1□                                                  | 1                               | at least 20min                                     | 7         |
| Optical (Fluorescence) | Au NCs/Fenton       | $2 \times 10^{-7}$ □□                                 | $8 \times 10^{-7}$ □            | 8 min                                              | This work |

Gys: cysteine; TMB: 3,3',5,5'-tetramethylbenzidine N-GOD: nitrogen-doped graphene quantum dots; PVP: polyvinylpyrrolidone; BSA: bovine serum albumin; PEI: polyethylenimine ; NCs: nanaocluster; QDs: quantum dots; AgNP: Ag nanoparticles;

1. X. Liu, S. Zhang, P. Tan, J. Zhou, Y. Huang, S. Yao, Z. Nie, Chem. Commun., 2013, 49, 1856-1858.
2. F. Wang, X. Liu, C. H. Lu, I. Willner, ACS Nano. 2013, 7, 7278-7286.
3. L. Lin, X. Song, Y. Chen, M. Rong, T. Zhao, Y. Wang, Y. Jiang, X. Chen, Analytica Chimica Acta 2013, 762, 83 - 86.
4. L. Hu, Y. Yuan, L. Zhang, J. Zhao, S. Majeed, G. Xu, Analytica Chimica Acta 2015, 869, 869, 89 - 95.
5. H. C. Chang, J. A. Ho, Anal. Chem. 2015, 87, 10362-10367.
6. Y. Ling, N. Zhang, F. Qu, T. Wen, Z. F. Gao, N. B. Li, H. Q. Luo, Spectrochimica Acta Part a-Molecular and Biomolecular Spectroscopy 2014, 118, 315-320.
7. R.Gill, L. Bahshi, R. Freeman, I. Willner, Angew. Chem. Int. Ed. 2008, 47, 1676-1679.

**Table S2.** Repeatability of fluorescence response of the Au NCs to 10  $\mu\text{M}$   $\text{H}_2\text{O}_2$  ( $F_0$  and  $F$  are the fluorescence intensity of the  $\text{H}_2\text{O}_2$  at 650 nm in the absence and presence of  $\text{H}_2\text{O}_2$ , respectively).

| No. | $F_0$ | F     | $F/F_0$ | Average value | Relative standard deviation (%) |
|-----|-------|-------|---------|---------------|---------------------------------|
| 1   | 159.0 | 39.3  | 0.2472  | 0.2414        | 3.32                            |
| 2   | 148.7 | 35.2  | 0.2367  |               |                                 |
| 3   | 148.3 | 34.33 | 0.2315  |               |                                 |
| 4   | 151.7 | 38.15 | 0.2515  |               |                                 |
| 5   | 149.9 | 36.01 | 0.2402  |               |                                 |

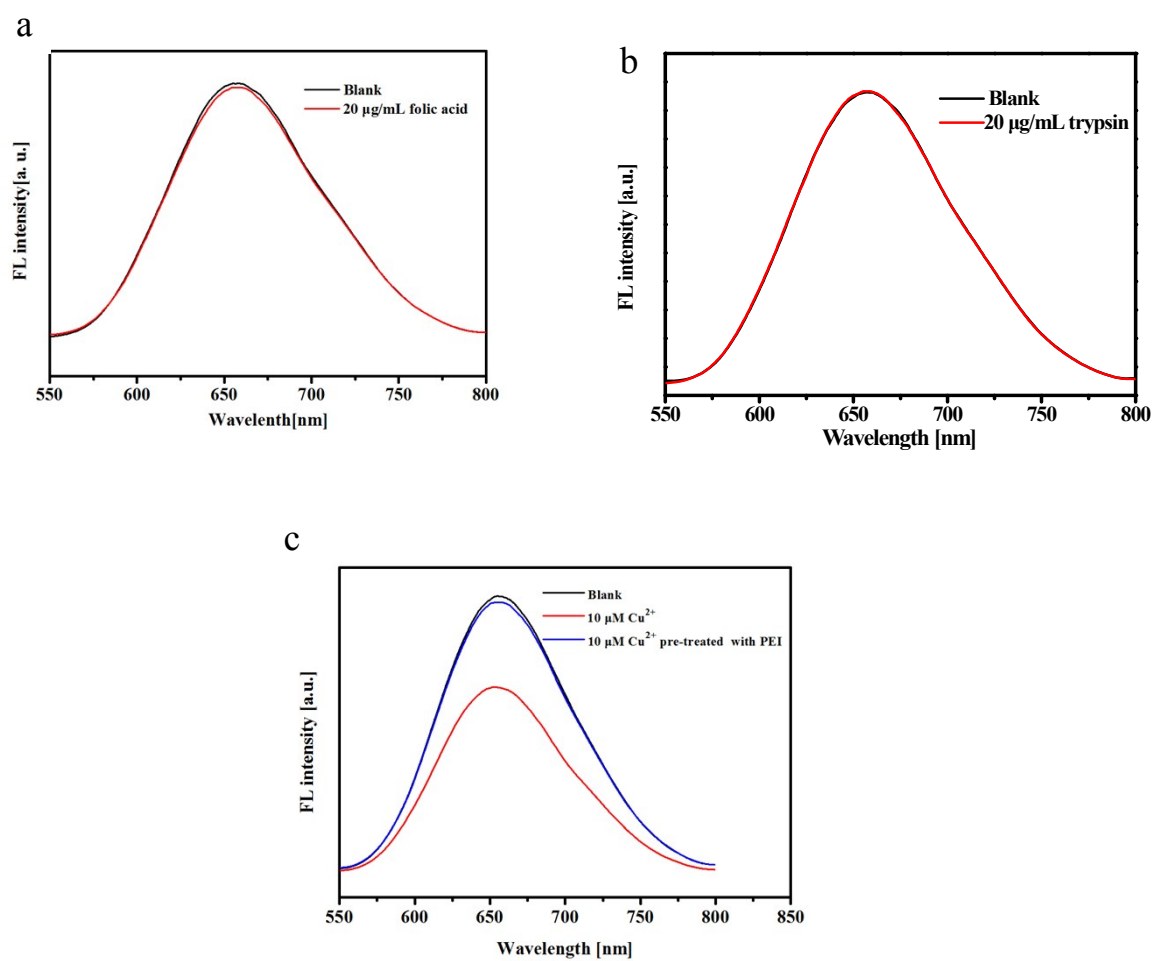

**Fig.S4.** Fluorescence response of our sensing system toward (a) 20 µg/ml folic acid and (b) 20 µg/ml trypsin; (c) Fluorescence response of the our sensing system toward 10 µM Cu<sup>2+</sup> before and after treated with PEI.

**Table S3.** Fluorescence response toward 10  $\mu\text{M}$   $\text{H}_2\text{O}_2$  by using Au NCs stored at 4  $^\circ\text{C}$  for 0, 1, 2 week, respectively.

| Week no. | $F_0$ | F     | $F/F_0$ | Average value | Relative standard deviation (%) |
|----------|-------|-------|---------|---------------|---------------------------------|
| 0        | 159.0 | 39.30 | 0.2472  | 0.2405        | 2.76                            |
| 1        | 143.4 | 33.54 | 0.2339  |               |                                 |
| 2        | 148.3 | 35.67 | 0.2405  |               |                                 |
